# Supplementary material for: Developing a rapid and highly efficient cowpea regeneration and transformation system using embryonic axis explants
Source: bioRxiv or medRxiv preprint supplement (doi:10.1101/738971), 2019-08-19
Supplement: Supplementary file [file media-1.pdf]

## Supporting information

### Cowpea transformation protocol

Unless otherwise specified, all the chemicals used for media preparation are from Sigma-Aldrich.

#### *Agrobacterium preparation*

1. **Master plate preparation:** Streak *Agrobacterium* from glycerol stock on the master plate medium (Table S1) containing different antibiotics based on the *Agrobacterium* strains and the constructs that bacterium carries to make master plates. Incubate the master plates at 28°C for 3-4 days. The master plates can be kept in the fridge to make working plates and last for a month.
2. **Working plate preparation:** Streak a working plate on the working plate medium (Table S2) using a loop of bacteria from the master plate prepared above and incubate the working plate at 28°C for overnight or over 20 hrs for LBA4404 Thy- and AGL1, respectively.
3. **Inoculum preparation:** Collect 5-7 full loops of bacteria from the working plate using a sterile loop, suspend bacteria in 30 mL infection medium (IM) (Table S3) with acetosyringone (AS, 1M stock in DMSO protected from light, final 200 µM) and dithiothreitol (DTT, 1 M stock, final 1 mM) freshly added in a sterile 50 mL centrifuge tube, adjust OD to 0.5.

#### *Cowpea EA explant preparation*

1. **Seed sterilization:** Cowpea seeds were surface sterilized using chlorine gas made by mixing in 3.5 mL of 12N HCl and 100 mL bleach (5.25% sodium hypochlorite) for 16 hrs.

2. **Seed pretreatment:** Soak sterilized cowpea IT89D-1010 seeds in the Bean Germination Medium (BGM) (Table S4) with ~45mL of water added for ~16 hrs. For other cowpea varieties transformed with AGL1 30 mL OMS medium (Table S8) was used to replace BGM.
3. **EA explants isolation:** Isolate embryo axis (EA) explants by removing the seed coats, cotyledons and plumules and put them into sterile water in a petri dish until infection.

#### *Cowpea transformation*

1. **Infection:** Remove water from petri dish (as much as possible), add 15 mL inoculum, and 50  $\mu$ L sterile Poloxamer 188 10% solution. Wrap the plate with parafilm and sonicate (VWR, Motel 50T, 120Volts, 1 A or FS30H, Fisher Scientific) for 3 sec. After sonication, add additional 10 mL inoculum (total 25 mL in petri dish) to the mix and gently shake on a at ~60 rpm for 1.5 hrs at room temperature.
2. **Co-cultivation:** Remove bacterium and transfer EAs to filter paper (VWR Cat No. 28320-020) blotted with 700  $\mu$ L IM in a 100 x 25mm petri dish. Thirty EAs can be piled up on the paper (2-4 piles per plate). Seal plates with micropore tape and keep plates in 21°C, 45% RH, 7.7 lums/ft<sup>2</sup> chamber for 2 days.

#### *Cowpea regeneration*

1. **Regeneration with selection:** Insert the roots of EAs vertically into SIM (Table S5) with cot-node and SAM above the medium. Incubate the EAs on SIM at 26°C under 24 hrs light conditions. Remove the SAM by cutting through the middle of epicotyl after 4-5 days culturing on SIM to promote axillary shoots formation at the cotyledon node region.

2. **Rooting:** After 3-5 weeks regeneration, harvest shoots bigger than 3 cm by cutting at base of shoot, and place into root induction medium (RIM) (Table S6).
3. **Shoot elongation:** After 3-5 weeks regeneration, if shoots did not reach to 3 cm, they were transferred to the shoot elongation medium (SEM) (Table S7) for 2-4 weeks culture before transfer to RIM.

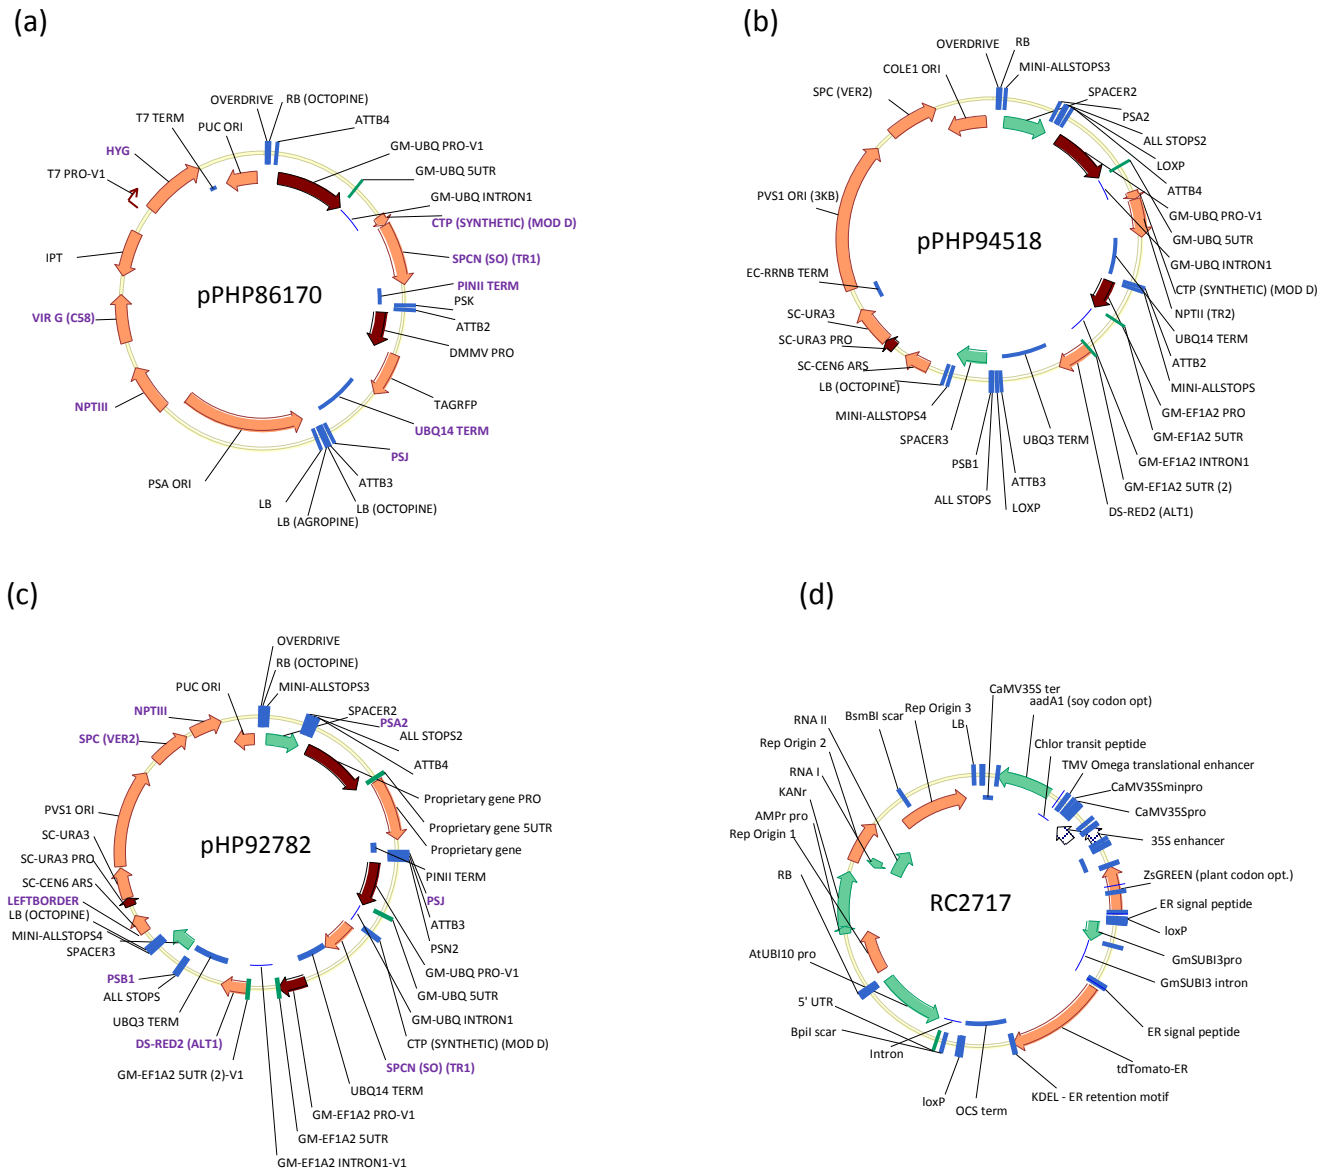

**Figure S1** Schematic representation of the molecular components of constructs used in this study. (a) pPHP86170 (b) pPHP84518 and (c) pPHP92782 were transformed with ternary vector system using pPHP71539 as helper in *Agrobacterium* strain LBA4404 Thy<sup>-</sup>. The genes and elements highlighted in purple are covered by event quality assays (Table S9). (d) RC2717 is a modified pCambia vector transformed into *Agrobacterium* AGL1 strain.

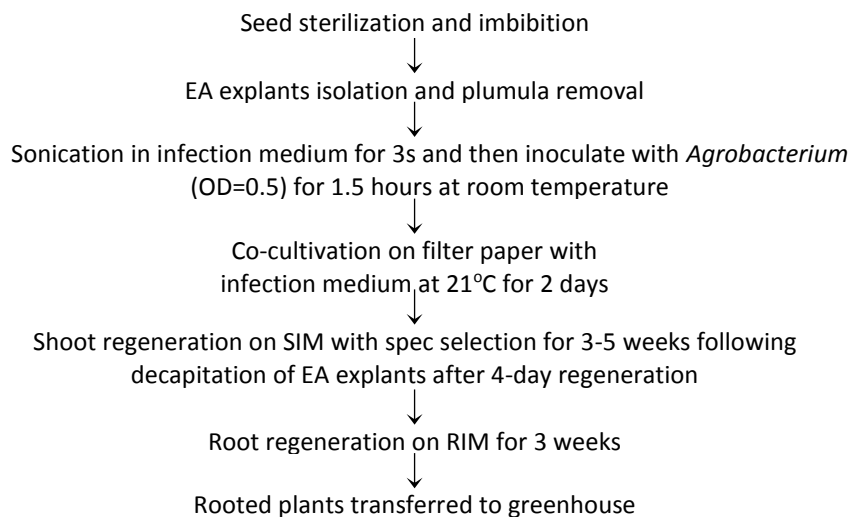

**Figure S2** Flow diagram of the cowpea EA-based *Agrobacterium*-mediated transformation process.

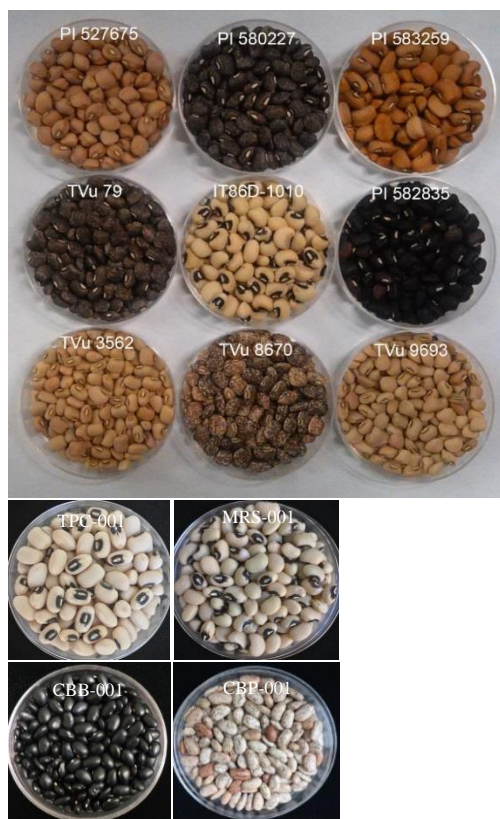

**Figure S3** Dry mature seeds of selected accessions of cowpea and common bean.

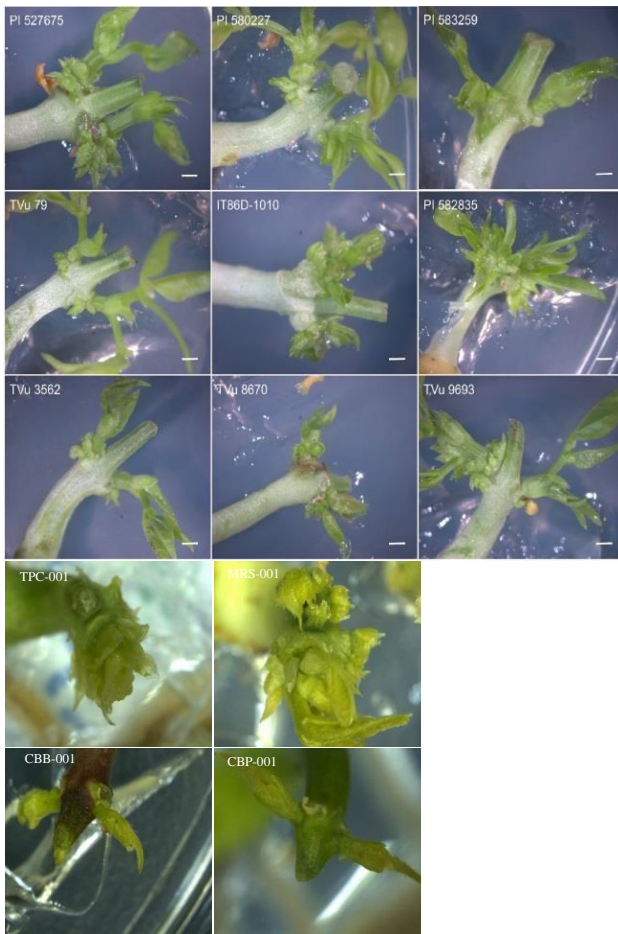

**Figure S4** Shoot organogenesis of selected accessions of cowpea and common bean.

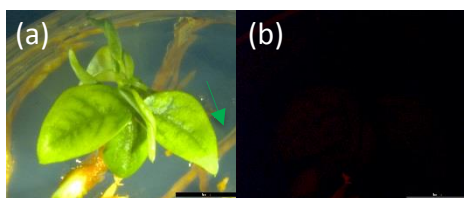

**Figure S5** Autofluorescence evaluation. (a) The bright field image and (b) fluorescence image under RFP filter of regenerated wild-type cowpea IT86D-1010. The arrow indicates the regenerated roots.

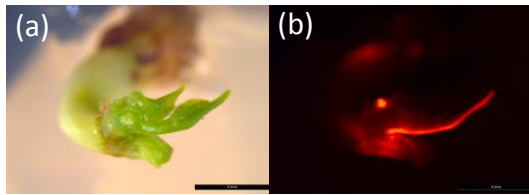

**Figure S6** Development of chimeric event using *CTP-NPTII/G418* selection system. (a) Bright field image. (b) Fluorescence image under RFP filter.

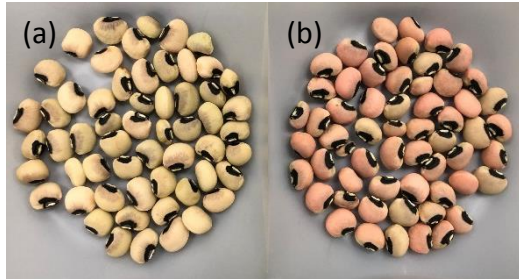

**Figure S7** Transgene segregation in the progeny. (a) Mature wild-type cowpea IT86D-1010 seeds. (b) Segregated T1 seeds (Event ID 125739950) in IT86D-1010 background harvested from T0 plant containing the *proGM-EF1A2:Ds-RED* as visual marker.

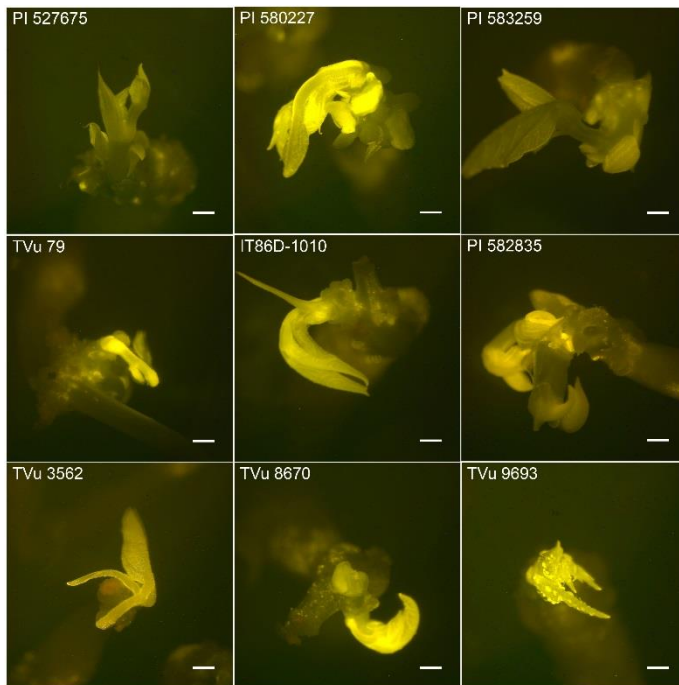

**Figure S8** Formation of transgenic shoots expressing *TdTomato* on the EA explants of nine cowpea germplasm lines after 14-d culture on SIM, bar = 1 mm.

**Table S1 Master plate medium**

|                                          |           |
|------------------------------------------|-----------|
| Glucose                                  | 5 g/l     |
| Bacto agar                               | 15 g/l    |
| Ferrous sulfate heptahydrate             | 2.5 mg/l  |
| Potassium phosphate dibasic              | 3 g/l     |
| Sodium phosphate, monobasic              | 1 g/l     |
| Ammonium chloride                        | 1 g/l     |
| Magnesium sulfate heptahydrate           | 0.3 g/l   |
| Potassium chloride                       | 0.15 g/l  |
| Calcium chloride dihydrate               | 11.4 mg/l |
| Thymidine (only for LBA4404 THY- strain) | 50 mg/l   |
| Antibiotics*                             |           |

\*100 mg/l kanamycin, 100 mg/l carbenicillin and 25 mg/l rifampicin were used for AGL1 carrying RC2717.

50mg/l gentamycin and 50 mg/l kanamycin were used for LBA4404 Thy- carrying pPHP86170/pPHP71539.

50mg/l gentamycin and 50 mg/l spectinomycin were used for LBA4404 Thy- carrying pPHP94518/pPHP71539 and pPHP92782/ pPHP71539.

**Table S2 Working plate medium**

|                                          |         |
|------------------------------------------|---------|
| Yeast extract (BD DIFCO)                 | 5 g/l   |
| Peptone                                  | 10 g/l  |
| Sodium chloride                          | 5 g/l   |
| Bacto agar                               | 15 g/l  |
| Thymidine (only for LBA4404 THY- strain) | 50 mg/l |
| Antibiotics*                             |         |

\*100 mg/l kanamycin, 100 mg/l carbenicillin and 25 mg/l rifampicin were used for AGL1 carrying RC2717.

50mg/l gentamycin and 50 mg/l kanamycin were used for LBA4404 Thy- carrying pPHP86170/pPHP71539.

50mg/l gentamycin and 50 mg/l spectinomycin were used for LBA4404 Thy- carrying pPHP94518/pPHP71539 and pPHP92782/ pPHP71539.

**Table S3 Infection medium (IM)**

|                                                                                             |                 |
|---------------------------------------------------------------------------------------------|-----------------|
| MS salt                                                                                     | 1 x             |
| MS vitamins                                                                                 | 1 x             |
| MES                                                                                         | 20 Mm (3.9 g/l) |
| Sucrose (w/v)                                                                               | 30 g/l          |
| pH                                                                                          | 5.4             |
| BAP                                                                                         | 0.5 mg/l        |
| Kinetin                                                                                     | 0.5 mg/l        |
| GA3                                                                                         | 0.25 mg/l       |
| Acetosyringone                                                                              | Add fresh       |
| L-cysteine                                                                                  | 400 mg/l        |
| BCDA (bathocuproinedisulfonic acid disodium salt)<br>(filter sterilized stock)              | 800 µL stock    |
| Thymidine (only for LBA4404 THY-)                                                           | 50 mg/l         |
| Polyvinylpyrrolidone (PVP40)                                                                | 1 mg/l          |
| Acetosyringone (stock 1M; final 200 µM)                                                     | 0.2 mL          |
| Dithiothrietol (DTT, stock 1M, filter sterilized<br>aliquot and stored at -80°C; final 1Mm) | 1 mL            |

**Table S4 Bean germination medium (BGM)**

|                          |            |
|--------------------------|------------|
| Sucrose                  | 25 g/l     |
| Thiamine Hydrochloride   | 1.34 mg/l  |
| Nicotinic acid           | 0.5 mg/l   |
| Pyridoxine Hydrochloride | 0.82 mg/l  |
| EDTA disodium            | 3.348 mg/l |



|                                         |              |
|-----------------------------------------|--------------|
| Ferrous sulfate heptahydrate            | 2.502 mg/l   |
| Boric acid                              | 1.86 mg/l    |
| Manganese sulfate, monohydrate          | 5.07 mg/l    |
| Zinc sulfate, heptahydrate              | 2.58 mg/l    |
| Potassium iodide                        | 0.249 mg/l   |
| Sodium molybdate dihydrate              | 0.216 mg/l   |
| Cupric sulfate pentahydrate             | 0.00075 mg/l |
| Cobalt chloride hexahydrate             | 0.00075 mg/l |
| Calcium chloride dihydrate              | 0.176 g/l    |
| Potassium nitrate                       | 0.505 g/l    |
| Ammonium nitrate                        | 0.24 g/l     |
| Potassium phosphate monobasic anhydrous | 0.027 g/l    |
| Magnesium sulfate heptahydrate          | 0.493 g/l    |
| TC agar (phytotechnology A296)          | 6 g/l        |

**Table S5** Shoot induction medium (SIM)

|                       |                 |
|-----------------------|-----------------|
| MS salt               | 1 x             |
| MS vitamins           | 1 x             |
| MES                   | 3 Mm (0.59 g/l) |
| Sucrose (w/v)         | 30 g/l          |
| Agar, DIFCO (w/v)     | 8 g/l           |
| pH                    | 5.6             |
| BAP                   | 0.5 mg/l        |
| Kinetin               | 0.5 mg/l        |
| Antibiotic selection* |                 |
| Polyvinylpyrrolidone  | 1 mg/l          |
| Silver nitrate        | 2 mg/l          |

\*25 mg/l spectinomycin and 15 mg/l meropenem was used for EA explants which transformation was carried out through LBA4404 Thy- strain-mediated transformation.

50 mg/l spectinomycin and 15 mg/l meropenem was used for EA explants which transformation was carried out through AGL1 strain-mediated transformation for the first 2 weeks culture and 50 mg/l spectinomycin and 30 mg/l meropenem after the first 2 weeks culture.

**Table S6** Rooting induction medium (RIM)

|                       |                 |
|-----------------------|-----------------|
| MS salt               | 1 x             |
| MS vitamins           | 1 x             |
| MES                   | 3 Mm (0.59 g/l) |
| Sucrose (w/v)         | 30 g/l          |
| Agar, DIFCO (w/v)     | 8 g/l           |
| pH                    | 5.6             |
| IBA                   | 0.1 mg/l        |
| Antibiotic selection* |                 |
| Polyvinylpyrrolidone  | 1 mg/l          |
| Sliver nitrate        | 2 mg/l          |

\*50 mg/l spectinomycin and 30 mg/l meropenem used for transgenic shoots which transformation were carried out through AGL1 strain-mediated transformation after the first 2 weeks culture.

**Table S7** Shoot elongation medium (SEM)

|               |                 |
|---------------|-----------------|
| MS salts      | 1 x             |
| MS vitamins   | 1 x             |
| MES           | 3 mM (0.59 g/l) |
| Sucrose (w/v) | 30 g/l          |

|                       |          |
|-----------------------|----------|
| Agar (w/v)            | 8 g/l    |
| pH                    | 5.6      |
| GA                    | 0.5 mg/l |
| Kinetin               | 0.1 mg/l |
| Asparagine            | 50 mg/l  |
| Antibiotic selection* |          |

\*25 mg/l spectinomycin and 15 mg/l meropenem used for transgenic shoots which transformation was carried through LBA4404 Thy- strain-mediated transformation.

50 mg/l spectinomycin and 30 mg/l meropenem used for transgenic shoots which transformation was carried out by AGL1 strain-mediated transformation.

**Table S8 OMS**

|                   |                 |
|-------------------|-----------------|
| MS salts          | 1 x             |
| MS vitamins       | 1 x             |
| MES               | 3 Mm (0.59 g/l) |
| Sucrose (w/v)     | 30 g/l          |
| Agar, DIFCO (w/v) | 8 g/l           |
| pH                | 5.6             |

**Table S9 Primers used for event quality assay**

| Event quality assay | Assay type         | Forward primer           | Reverse primer                  |
|---------------------|--------------------|--------------------------|---------------------------------|
| <i>LBS</i>          | Endogenous control | CACATACCTCCAGTGAGTCCCTTA | TCGAAGCATCTACTAACTACAGAAGAATTAA |
| <i>Ds-RED</i>       | Copy number        | AAGTCCATCTACATGGCCAAGAA  | TGGGAGGTGATGTCCAGCTT            |
| <i>SPCN</i>         | Copy number        | CTGCCCGCAATGCTCTTT       | ATTACCACTGGACCGTCACAGA          |
| <i>CTP</i>          | Copy number        | TGGCTGCAACTACTTACATCTG   | TGTAAGTTGAAAGGAGCACTTGGT        |
| <i>UBQ14_TERM</i>   | Copy number        | CAGAACCCAGAATCCCTTCATATC | TGACGGCTGGGACTTCTTTG            |
| HYGROMYCIN          | Vector backbone    | CAGCGAGAGCCTGACCTATTG    | CAGCGAGAGCCTGACCTATTG           |
| VIRG                | Vector backbone    | TGCTCCGAGACGGTCGAT       | CAGGCAGGTCTTGCAACGT             |
| SPC                 | Vector backbone    | GCGCTGCCATTCTCAAAT       | ATCATTCCGTGGCGTTATCC            |
| LEFTBORDER          | Vector backbone    | GATCTCGCGGAGGGTAGCA      | CGAGGGAGATGATATTTGATCACA        |
| NPTIII              | Vector backbone    | CCGATGTGGATTGCGAAAA      | GCTCGCGGGATCTTTAA               |
